# Supplementary material for: Potential for Biological Control of Pythium schmitthenneri Root Rot Disease of Olive Trees (Olea europaea L.) by Antagonistic Bacteria
Source: MDPI journal article supplement (doi:10.3390/microorganisms10081635), 2022-08-12
Supplement: s1 [file s1]

**Supplementary Table S1:** Summary of relative hydrolytic enzyme and lipopeptides exhibited by the ten bacterial isolates [38,39].

| Isolate | Amylase | Protease | Cellulase | HCN | Bacillomycin | Fengycin | Iturin | Surfactin |
|---------|---------|----------|-----------|-----|--------------|----------|--------|-----------|
| ACBC1   | +       | +        | +         | -   | -            | -        | +      | -         |
| ACBC2   | -       | +        | -         | -   | +            | +        | -      | -         |
| ACBP1   | +       | -        | +         | +   | -            | -        | +      | -         |
| ACBP2   | +       | +        | -         | -   | -            | -        | -      | -         |
| SF14    | -       | +        | +         | -   | +            | +        | -      | +         |
| K3-7    | +       | +        | +         | -   | -            | -        | -      | -         |
| Bel3-4  | +       | +        | +         | -   | +            | -        | -      | -         |
| TG6     | +       | +        | +         | -   | +            | -        | -      | -         |
| BM3-5   | +       | +        | +         | -   | -            | +        | +      | -         |
| GH1-5   | +       | +        | +         | -   | +            | +        | -      | -         |
